# Supplementary material for: Enhancing mRNA stability and translational potential through tailored modifications at the 3′ end
Source: Royal Society of Chemistry journal article supplement (doi:10.1039/d6cb00033a), 2026-04-17

## Supplementary Information

### Enhancing mRNA Stability and Translational Potential Through Tailored Modifications at the 3' End

Olga Perzanowska,<sup>a,b</sup> Joanna Kowalska<sup>a\*</sup>, Jacek Jemielity<sup>b\*</sup>

<sup>a</sup> Division of Biophysics, Faculty of Physics, University of Warsaw, Ludwika Pasteura 5, 02-093, Warsaw, Poland

<sup>b</sup> Centre of New Technologies, University of Warsaw, Stefana Banacha 2c, 02-097, Warsaw, Poland

**E-mail:** [j.jemielity@cent.uw.edu.pl](mailto:j.jemielity@cent.uw.edu.pl), [Joanna.Kowalska@fuw.edu.pl](mailto:Joanna.Kowalska@fuw.edu.pl)

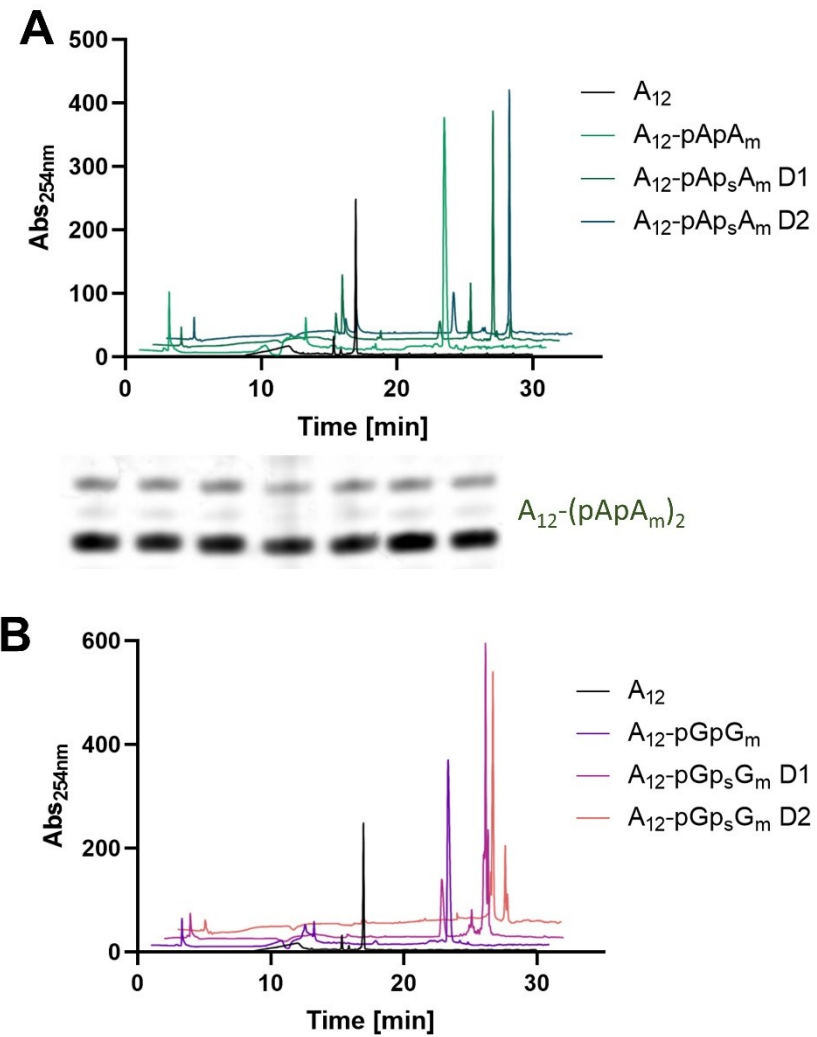

**Figure S1.** RP-HPLC analysis of short RNA after ligation with (A) adenosine and (B) guanosine dinucleotides.  $A_{12}$  RNA was used as reference. In (A) gel image of 16-mer product of double ligation with pApA<sub>m</sub> dinucleotide.

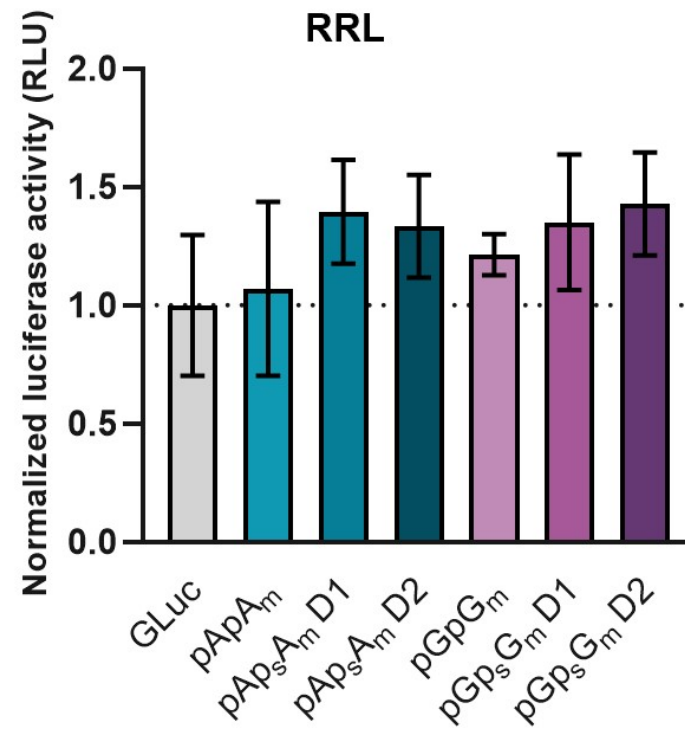

**Figure S2.** Translation efficiency experiment in Rabbit Reticulocyte Lysate (RRL) system.

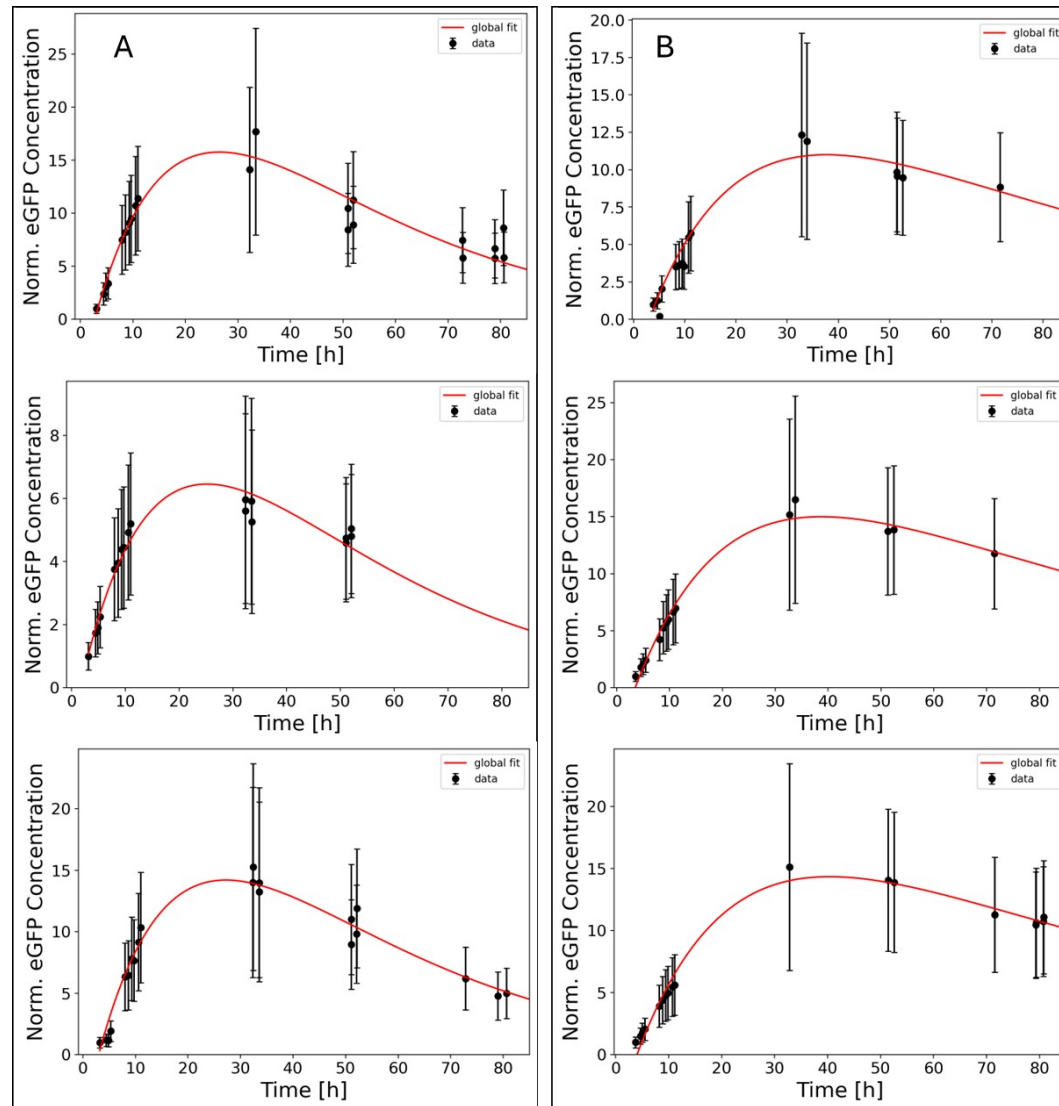

**Figure S3.** Simple kinetic model (red lines, Eq. 3) fitted to the eGFP concentration data registered from single mRNA-injected cells. Two distinct mRNA variants were tested: (A) unmodified eGFP and (B) eGFP-pAp<sub>s</sub>A<sub>m</sub>D1.

**Table S1. Kinetic parameters (protein half-life,  $t_{dp}$  and mRNA half-life  $t_{dm}$ ) of fits plotted in Figure S3.**

| mRNA variant                                 | $t_{dp}$ [h] | $t_{dm}$ [h] |
|----------------------------------------------|--------------|--------------|
| eGFP-mRNA                                    | $21 \pm 5$   | $27 \pm 6$   |
| eGFP-mRNA                                    | $21 \pm 5$   | $27 \pm 9$   |
| eGFP-mRNA                                    | $21 \pm 5$   | $28 \pm 7$   |
| eGFP-pAp <sub>s</sub> A <sub>m</sub> D1-mRNA | $21 \pm 5$   | $66 \pm 24$  |
| eGFP-pAp <sub>s</sub> A <sub>m</sub> D1-mRNA | $21 \pm 5$   | $71 \pm 21$  |
| eGFP-pAp <sub>s</sub> A <sub>m</sub> D1-mRNA | $21 \pm 5$   | $63 \pm 24$  |

pApA<sub>m</sub>

Chemical structure

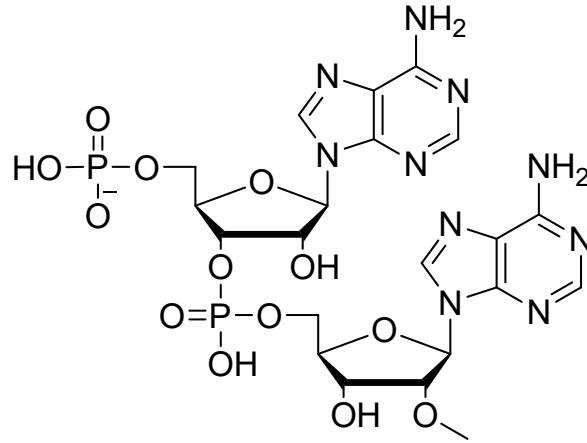

RP HPLC

pApA<sub>m</sub>

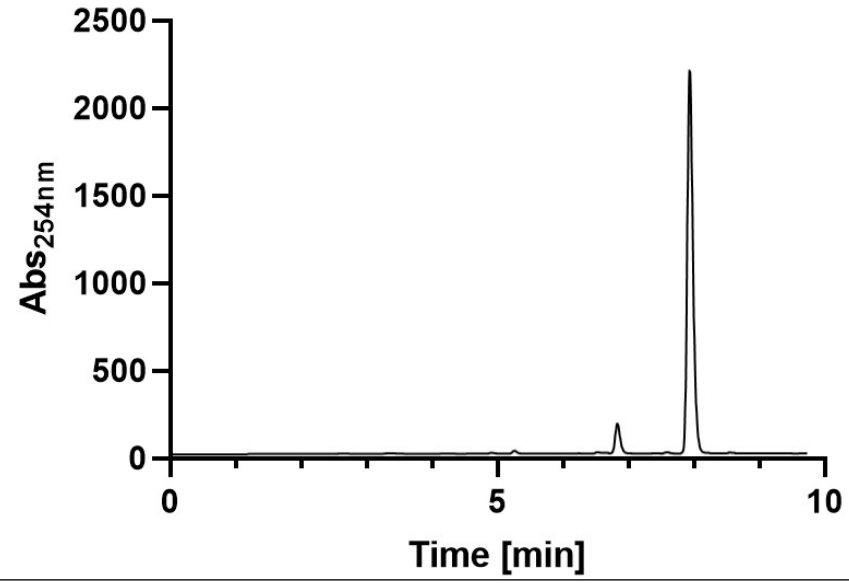

**MS (-) ESI**  
**(Calc. [M-H]<sup>-</sup> C<sub>21</sub>H<sub>27</sub>N<sub>10</sub>O<sub>13</sub>P<sub>2</sub> 689.1240)**

220413\_OPA\_5 #30-133 RT: 0.26-1.16 AV: 104 NL: 1.16E6  
T: FTMS - p ESI Full ms [160.0000-2000.0000]

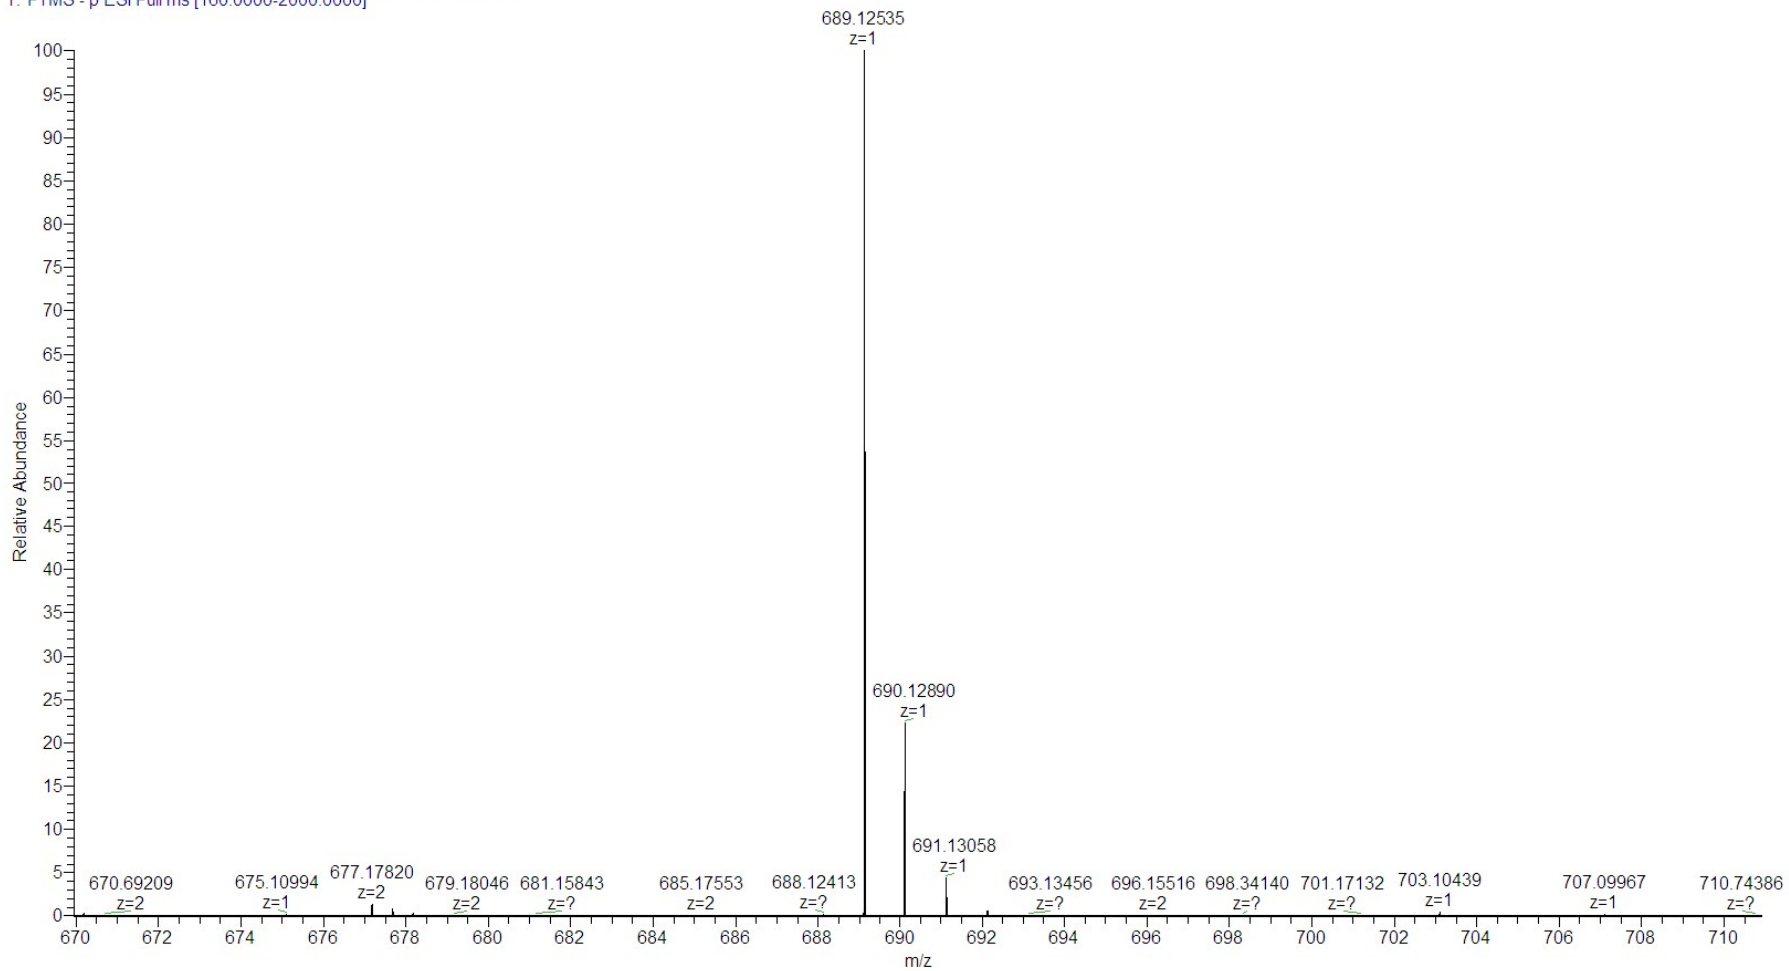

pAp<sub>s</sub>A<sub>m</sub> D1/D2

Chemical structure

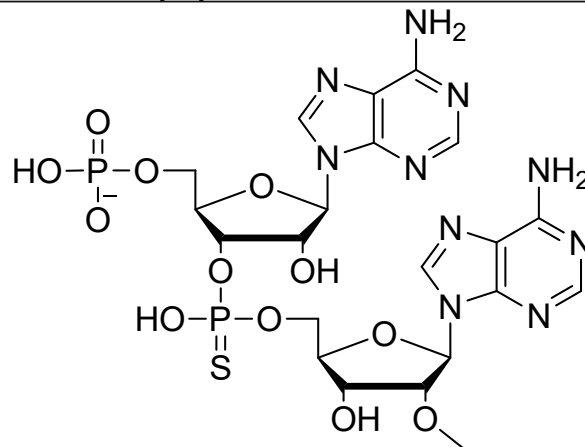

RP HPLC

pAp<sub>s</sub>A<sub>m</sub> D1

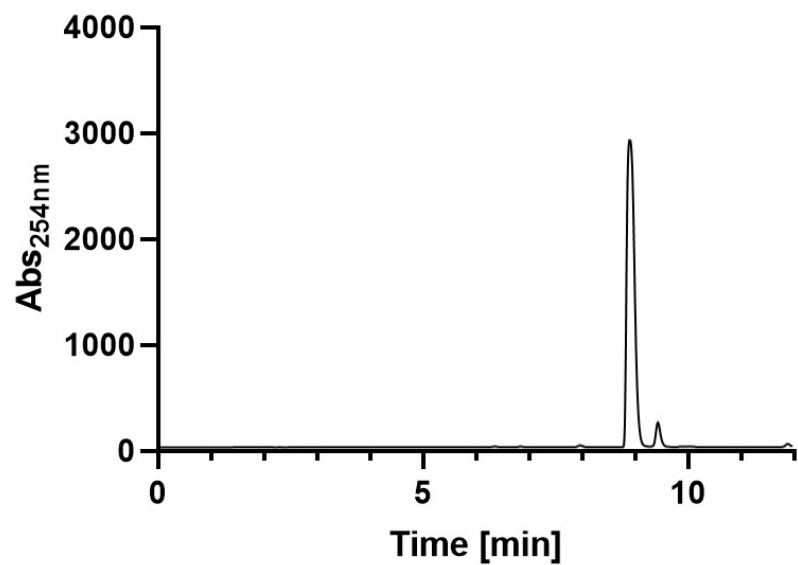

pAp<sub>s</sub>A<sub>m</sub> D2

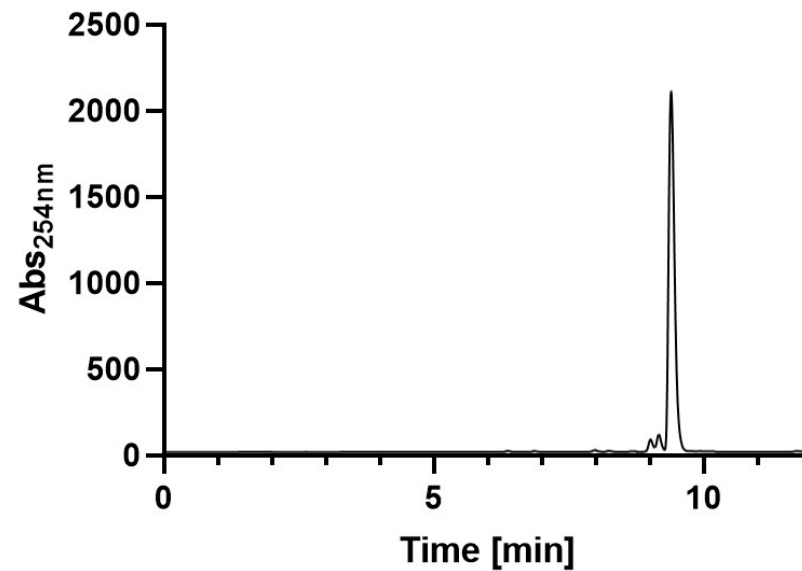

**MS (-) ESI**  
**D1 (Calc. [M-H]<sup>-</sup> C<sub>21</sub>H<sub>27</sub>N<sub>10</sub>O<sub>12</sub>P<sub>2</sub>S<sup>-</sup> 705.1011)**

220413 OPA\_6 #5-60 RT: 0.04-0.52 AV: 56 NL: 3.39E7  
T: FTMS - p ESI Full ms [160.0000-2000.0000]

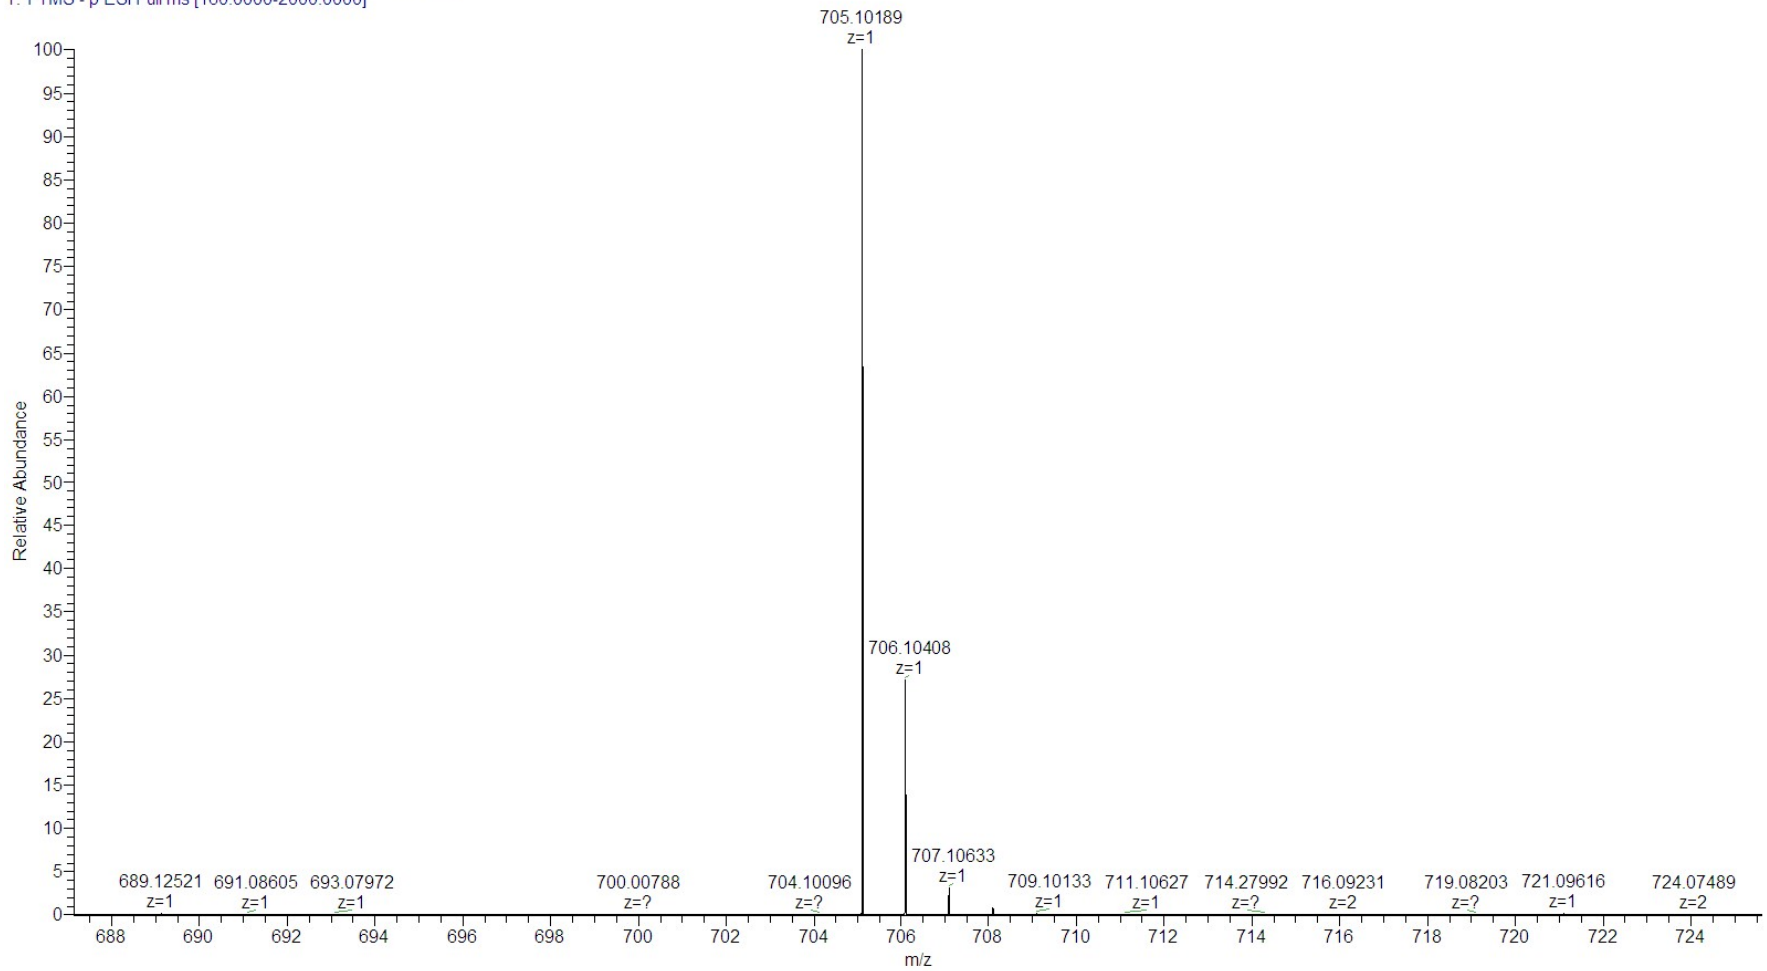

**MS (-) ESI**  
**D2 (Calc. [M-H]<sup>-</sup> C<sub>21</sub>H<sub>27</sub>N<sub>10</sub>O<sub>12</sub>P<sub>2</sub>S<sup>-</sup> 705.1011)**

220413\_OPA\_7 #138-234 RT: 1.21-2.05 AV: 97 NL: 7.29E6  
T: FTMS - p ESI Full ms [160.0000-2000.0000]

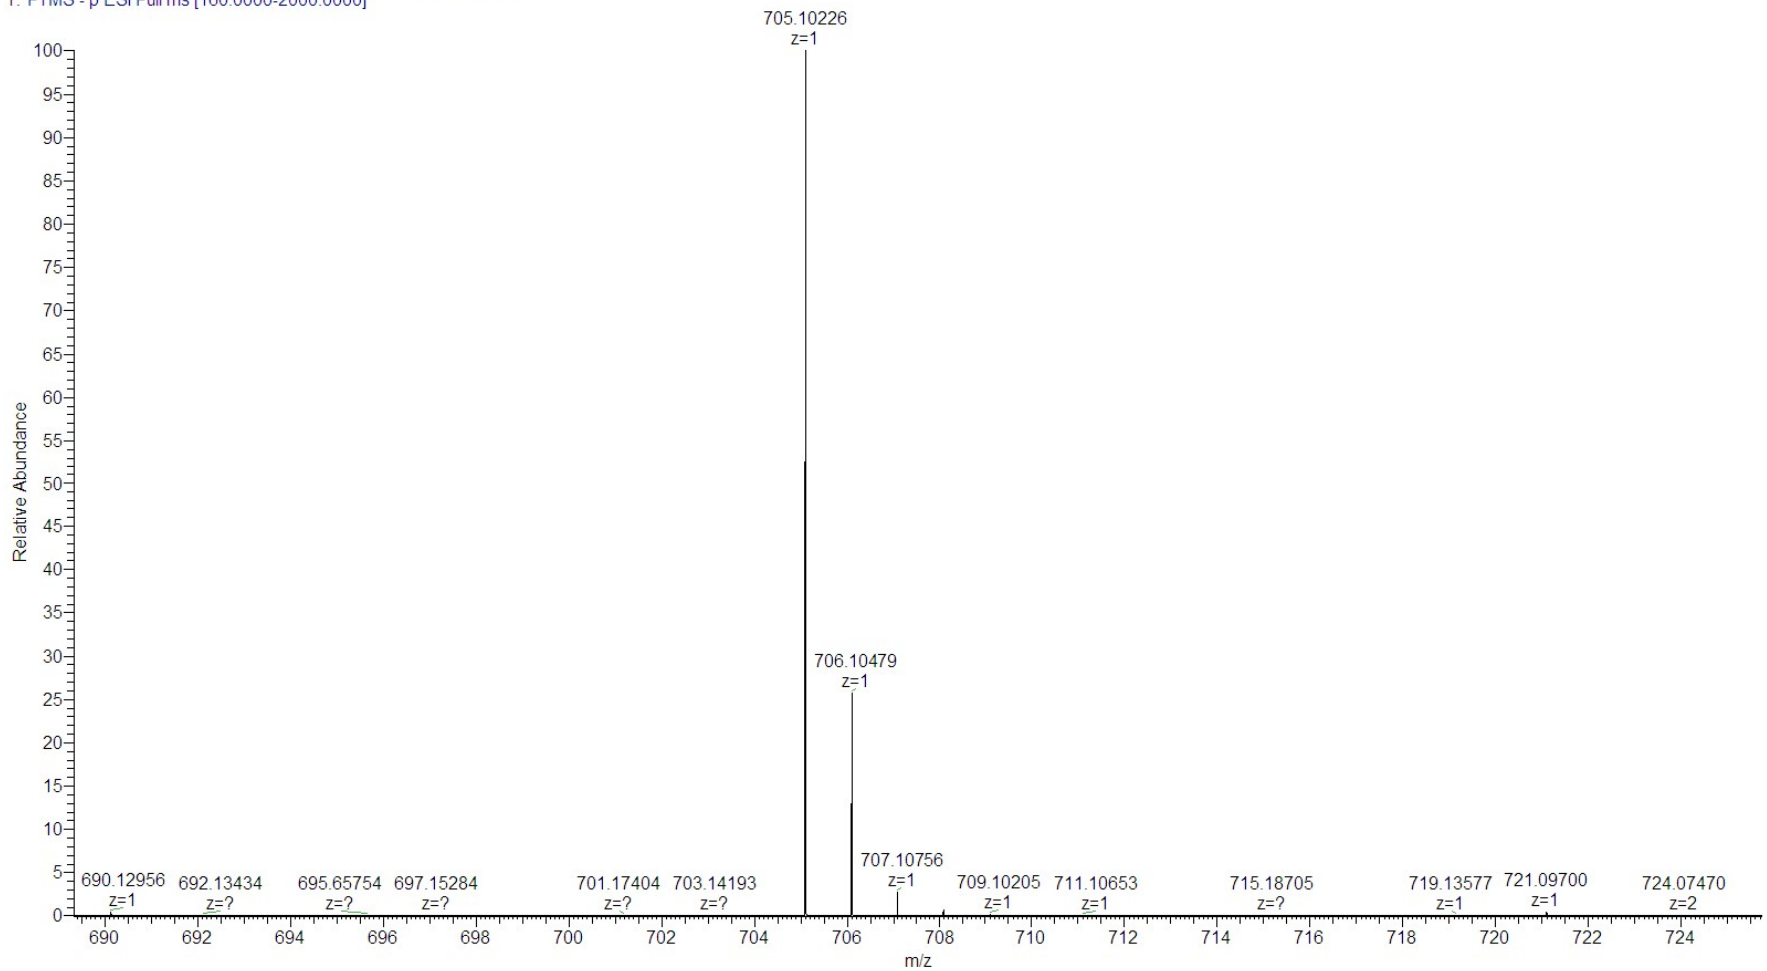

pGpG<sub>m</sub>

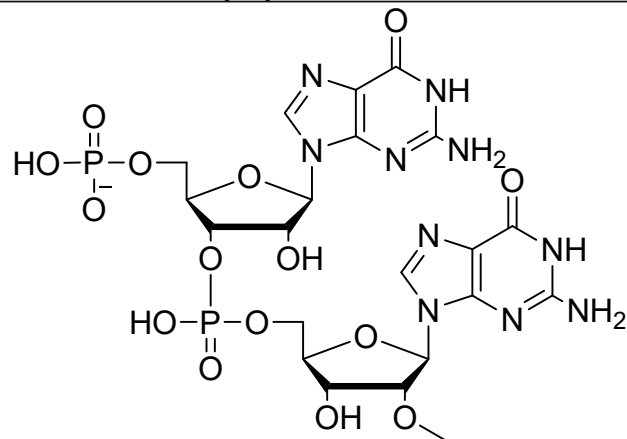

pGpG<sub>m</sub>

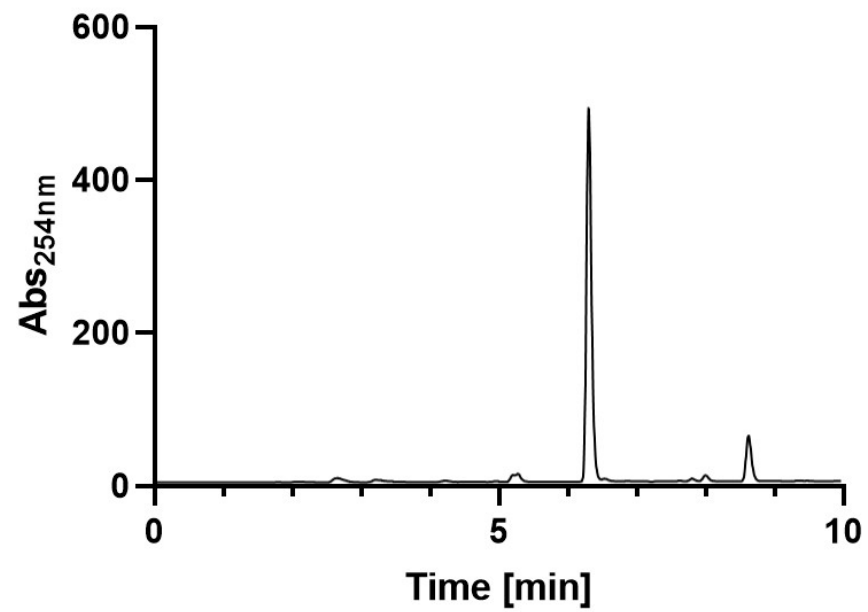

Chemical structure

RP HPLC

**MS (-) ESI**  
(Calc.  $[M-H]^-$   $C_{21}H_{27}N_{10}O_{15}P_2^-$  721.1138)

230413 OP\_1#121-274 RT: 1.06-2.40 AV: 154 NL: 3.43E5  
T: FTMS - p ESI Full ms [300.0000-2000.0000]

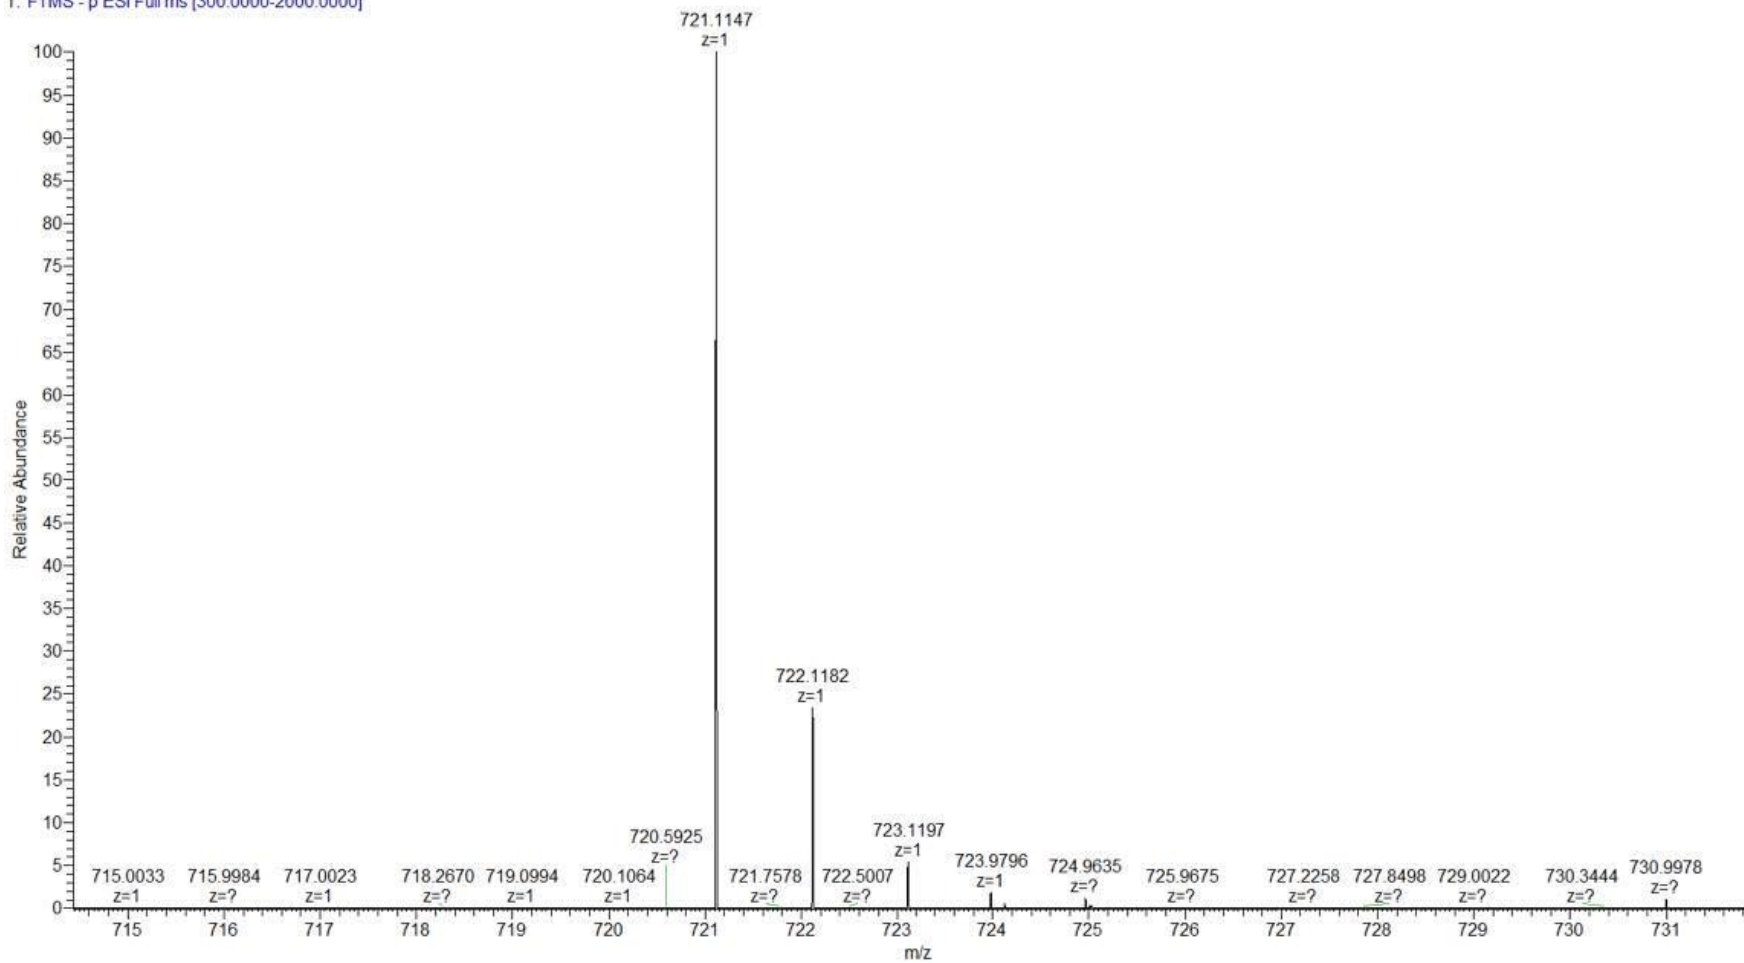

pGp<sub>s</sub>G<sub>m</sub> D1/D2

Chemical structure

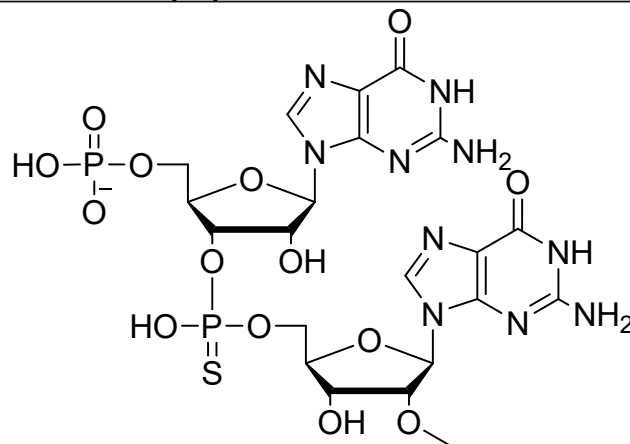

RP HPLC

pGp<sub>s</sub>G<sub>m</sub> D1

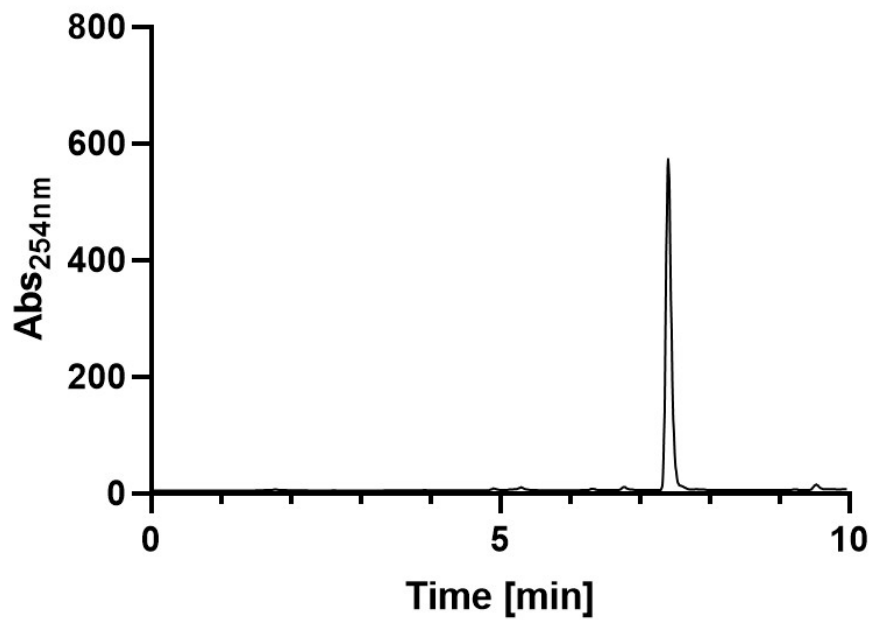

pGp<sub>s</sub>G<sub>m</sub> D2

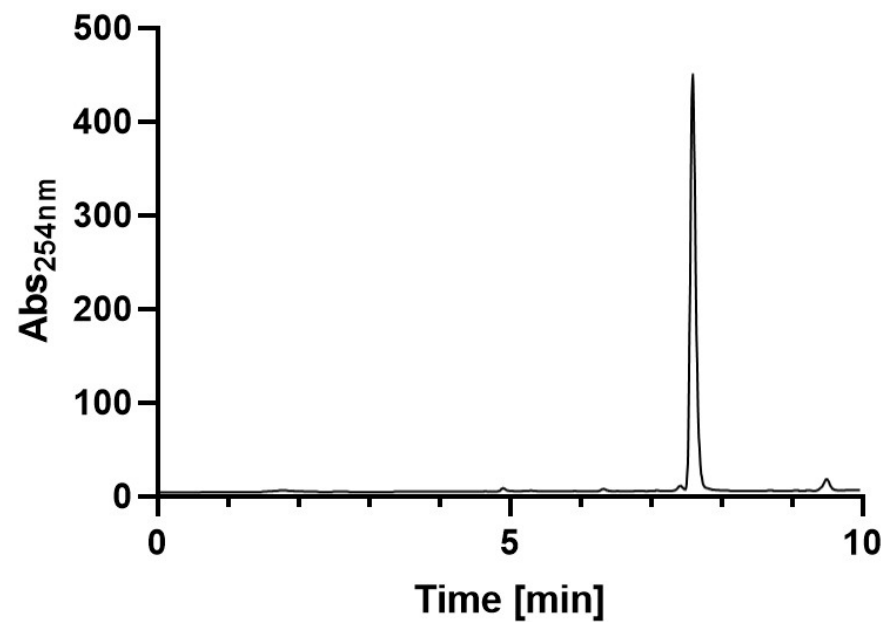

**MS (-) ESI**  
**D1 (Calc. [M-H]<sup>-</sup> C<sub>21</sub>H<sub>27</sub>N<sub>10</sub>O<sub>12</sub>P<sub>2</sub>S<sup>-</sup> 737.0909)**

220413\_OPA\_3#124-254 RT: 1.09-2.22 AV: 131 NL: 4.74E5  
T: FTMS - p ESI Full ms [160.0000-2000.0000]

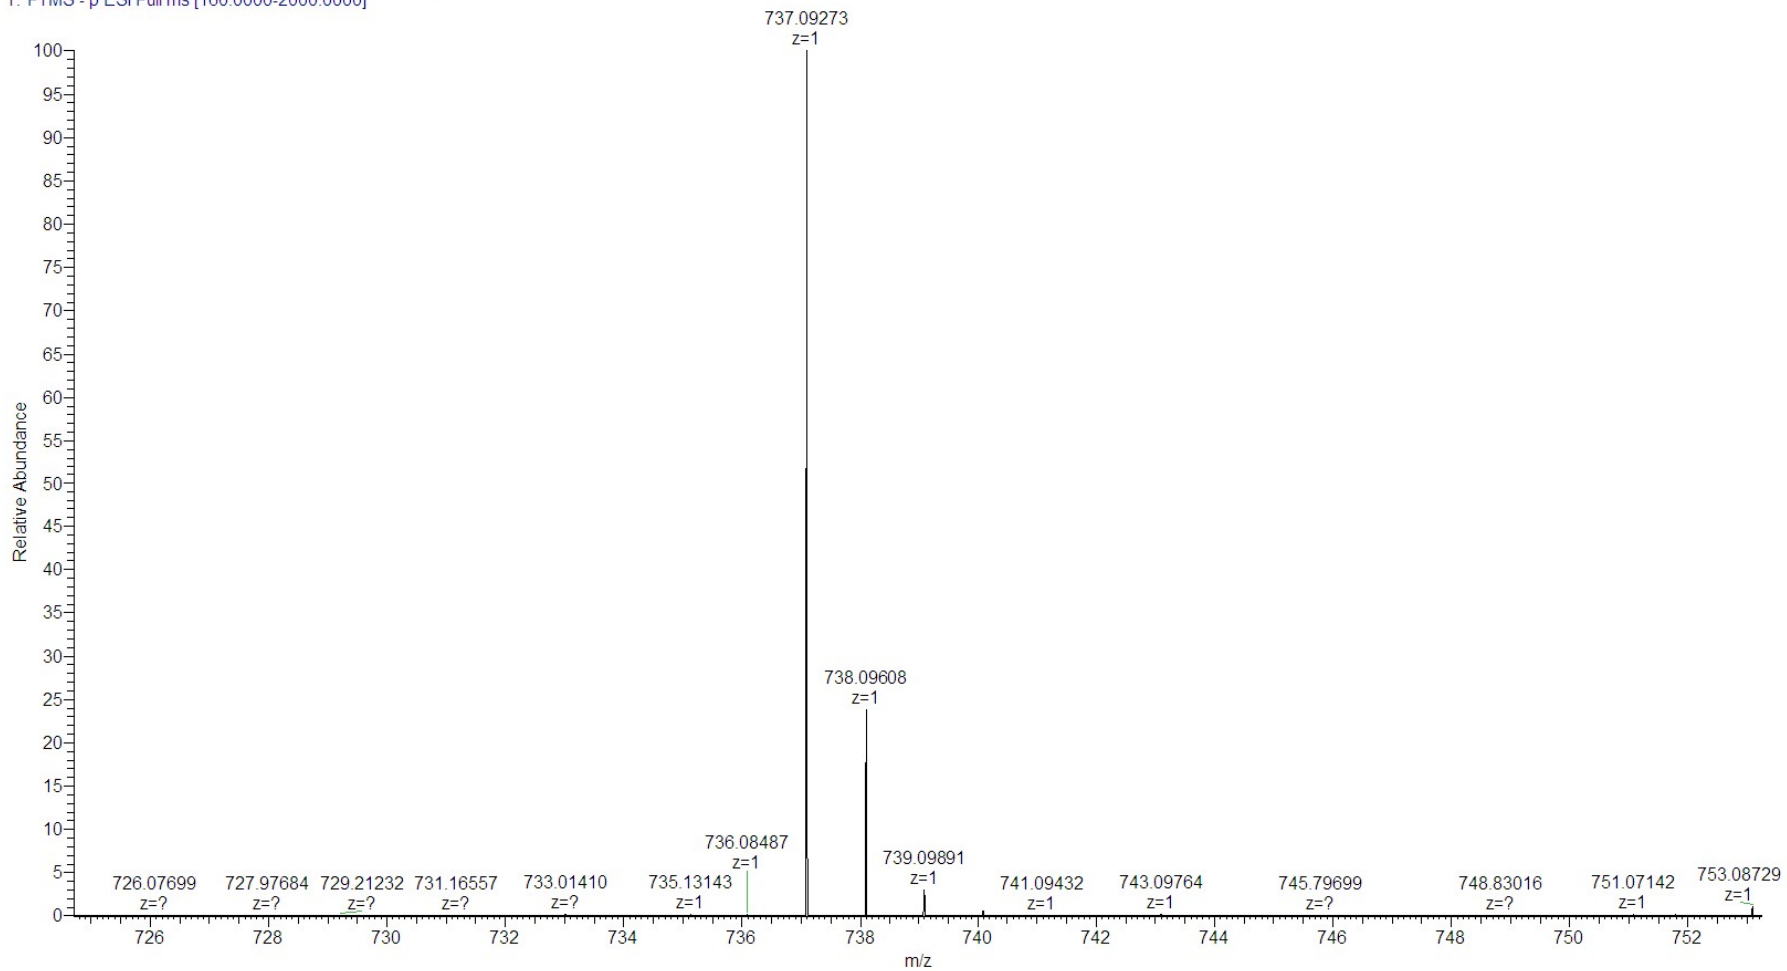

**MS (-) ESI**  
**D2 (Calc. [M-H]<sup>-</sup> C<sub>21</sub>H<sub>27</sub>N<sub>10</sub>O<sub>12</sub>P<sub>2</sub>S<sup>-</sup> 737.0909)**

220413\_OPA\_4 #7-108 RT: 0.06-0.94 AV: 102 NL: 4.75E5  
T: FTMS - p ESI Full ms [160.0000-2000.0000]

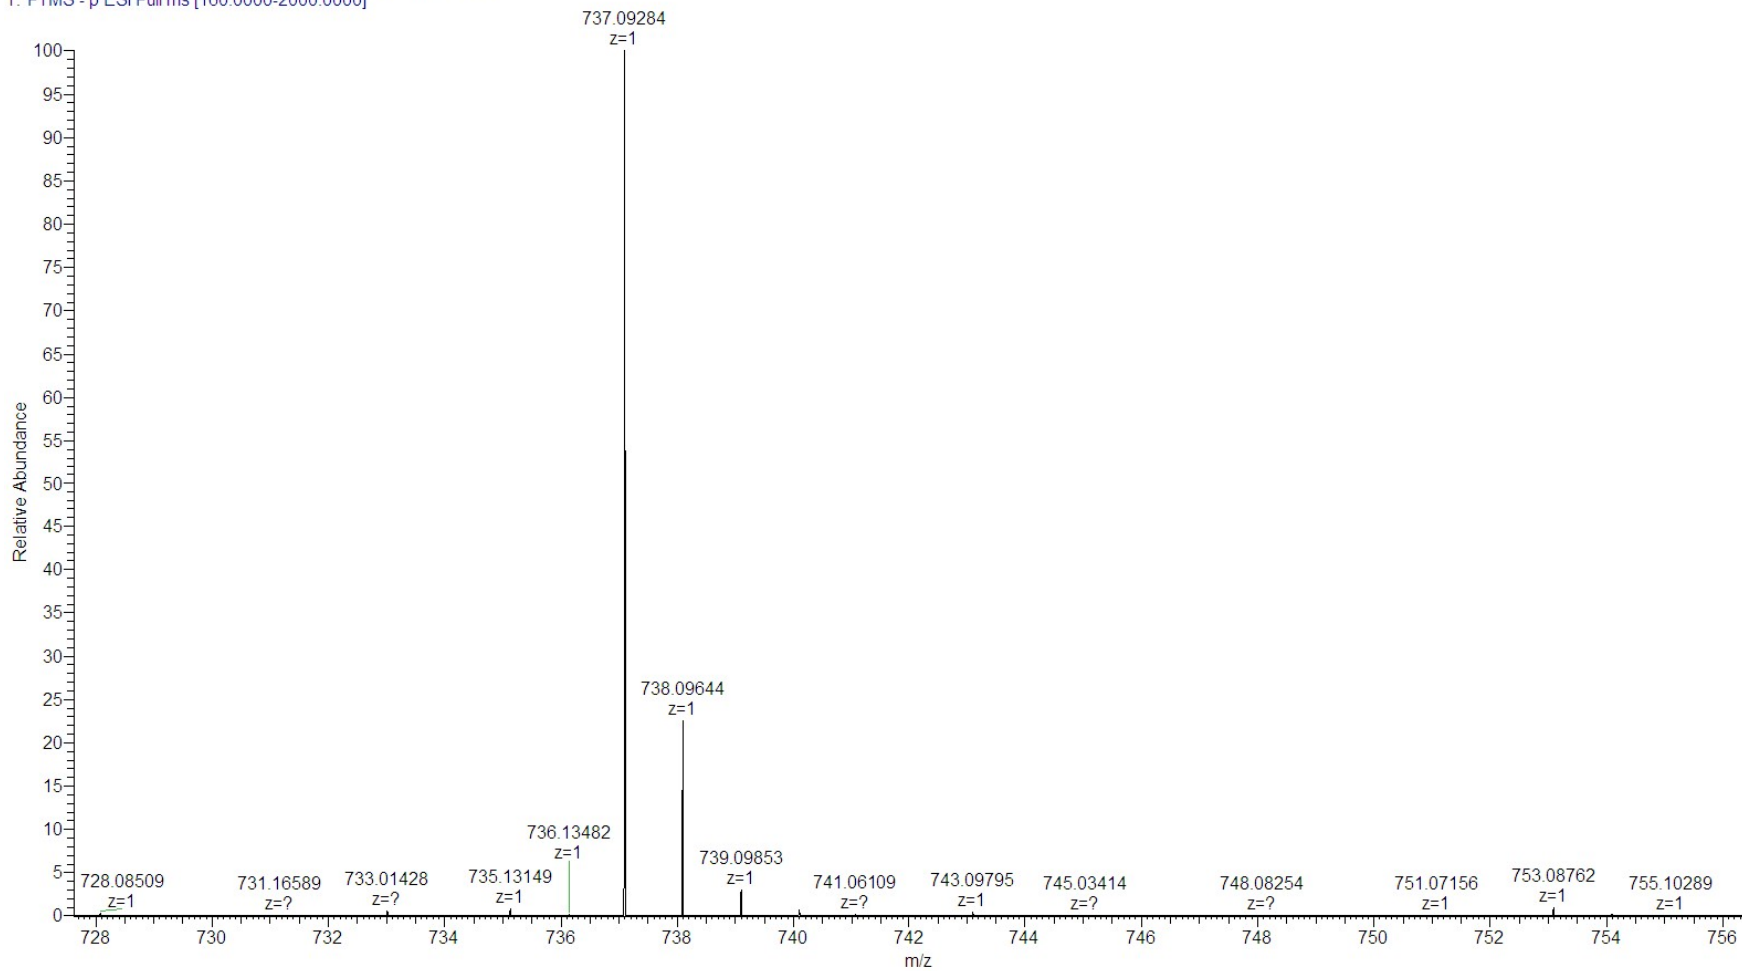

Supplement: d6cb00033a1.pdf [file d6cb00033a1.pdf]
